# Supplementary material for: The Optimization of Medium Conditions and Auxins in the Induction of Adventitious Roots of Pokeweed (Phytolacca americana L.) and Their Phytochemical Constituents
Source: Hindawi journal article supplement (doi:10.1155/2023/2983812), 2023-08-21
Supplement: f1 [file 2983812.f1.pdf]

| Treatments    | Survival | Response | Root inductid | Adv_root_n | Lat_root_nu | Adv_root_2ler | Lat_root_len | FW     | DW    |
|---------------|----------|----------|---------------|------------|-------------|---------------|--------------|--------|-------|
| 0 mg/l in Sem | 100      | 100      | 0             | 0          | 0           | 0             | 0            | 0      | 0     |
| 0 mg/l in Sem | 100      | 100      | 0             | 0          | 0           | 0             | 0            | 0      | 0     |
| 0 mg/l in Sem | 100      | 100      | 0             | 0          | 0           | 0             | 0            | 0      | 0     |
| 0 mg/l in Sem | 100      | 100      | 0             | 0          | 0           | 0             | 0            | 0      | 0     |
| 0 mg/l in Sem | 100      | 100      | 0             | 0          | 0           | 0             | 0            | 0      | 0     |
| 0 mg/l in Sem | 100      | 100      | 0             | 0          | 0           | 0             | 0            | 0      | 0     |
| 0.5 mg/l NAA  | 100      | 100      | 100           | 2          | 14          | 4.2           | 1.3          | 38.8   | 8.3   |
| 0.5 mg/l NAA  | 100      | 100      | 0             | 2          | 9           | 2.2           | 0.6          | 196.9  | 16.1  |
| 0.5 mg/l NAA  | 100      | 100      | 100           | 4          | 8           | 5             | 1.2          | 55.5   | 7     |
| 0.5 mg/l NAA  | 100      | 100      | 50            | 4          | 12          | 2.7           | 0.4          | 45.7   | 12    |
| 0.5 mg/l NAA  | 100      | 100      | 100           | 3          | 20          | 2.5           | 0.8          | 17.8   | 6.2   |
| 0.5 mg/l NAA  | 100      | 100      | 100           | 3          | 13          | 2.3           | 0.7          | 152.1  | 4.6   |
| 1 mg/l in NAA | 100      | 100      | 100           | 5          | 6           | 2.7           | 1.2          | 75.2   | 5.8   |
| 1 mg/l in NAA | 100      | 100      | 50            | 7          | 6           | 2.8           | 1.7          | 100.7  | 6.9   |
| 1 mg/l in NAA | 100      | 100      | 100           | 4          | 7           | 2.3           | 1.3          | 11.8   | 23.2  |
| 1 mg/l in NAA | 100      | 100      | 100           | 4          | 11          | 3             | 1.4          | 153.4  | 15.6  |
| 1 mg/l in NAA | 100      | 100      | 100           | 1          | 4           | 3.9           | 1            | 200.3  | 2.4   |
| 1 mg/l in NAA | 100      | 100      | 100           | 5          | 5           | 2.2           | 1.2          | 200.3  | 8.2   |
| 2 mg/l NAA in | 100      | 100      | 100           | 2          | 8           | 3.6           | 1.8          | 87.1   | 15    |
| 2 mg/l NAA in | 100      | 100      | 100           | 2          | 10          | 4.1           | 1.4          | 185    | 16.6  |
| 2 mg/l NAA in | 100      | 100      | 50            | 5          | 9           | 2.6           | 1.5          | 252.4  | 18.2  |
| 2 mg/l NAA in | 100      | 100      | 50            | 3          | 6           | 2.2           | 1.2          | 219.1  | 12.4  |
| 2 mg/l NAA in | 100      | 100      | 100           | 3          | 6           | 3.3           | 1            | 235.2  | 7.1   |
| 2 mg/l NAA in | 100      | 100      | 100           | 2          | 5           | 3             | 0.8          | 185    | 5.5   |
| 4 mg/l NAA in | 100      | 100      | 50            | 1          | 10          | 3.8           | 2.3          | 79.5   | 4.9   |
| 4 mg/l NAA in | 100      | 100      | 100           | 1          | 11          | 1.7           | 1.9          | 74.8   | 6.2   |
| 4 mg/l NAA in | 100      | 100      | 100           | 4          | 5           | 3             | 1.3          | 98.4   | 6.3   |
| 4 mg/l NAA in | 100      | 100      | 100           | 3          | 7           | 3.5           | 0.6          | 72.8   | 4.7   |
| 4 mg/l NAA in | 100      | 100      | 100           | 5          | 6           | 2             | 0.9          | 76     | 6.1   |
| 4 mg/l NAA in | 100      | 100      | 100           | 3          | 10          | 2.5           | 1.1          | 80.3   | 5.64  |
| 0.5 mg/l IBA  | 100      | 100      | 100           | 1          | 2           | 2.4           | 0.6          | 24.05  | 1.325 |
| 0.5 mg/l IBA  | 100      | 100      | 100           | 2          | 4           | 1.2           | 1.7          | 24.05  | 1.325 |
| 0.5 mg/l IBA  | 100      | 100      | 50            | 3          | 1           | 2.2           | 1.4          | 35.525 | 1.775 |
| 0.5 mg/l IBA  | 100      | 100      | 50            | 3          | 1           | 1.3           | 0.2          | 35.525 | 1.775 |
| 0.5 mg/l IBA  | 100      | 100      | 50            | 2          | 1           | 1.4           | 0.8          | 9.325  | 0.6   |
| 0.5 mg/l IBA  | 100      | 100      | 50            | 5          | 1           | 1.2           | 0.4          | 9.325  | 0.6   |
| 1 mg/l IBA in | 100      | 100      | 50            | 2          | 2           | 1.8           | 1.7          | 78.7   | 3.325 |
| 1 mg/l IBA in | 100      | 100      | 100           | 6          | 1           | 2             | 0.5          | 78.7   | 3.325 |
| 1 mg/l IBA in | 100      | 100      | 100           | 5          | 4           | 2.1           | 0.6          | 50.2   | 2.475 |
| 1 mg/l IBA in | 100      | 100      | 50            | 5          | 1           | 1.1           | 0.9          | 50.2   | 2.475 |
| 1 mg/l IBA in | 100      | 100      | 50            | 4          | 4           | 1             | 0.6          | 41.55  | 1.925 |
| 1 mg/l IBA in | 100      | 100      | 50            | 3          | 1           | 1.5           | 0.7          | 41.55  | 1.925 |
| 2 mg/l IBA in | 100      | 100      | 100           | 2          | 2           | 1.5           | 0.5          | 30.8   | 2     |
| 2 mg/l IBA in | 100      | 100      | 50            | 2          | 2           | 0.8           | 0.3          | 30.8   | 2     |
| 2 mg/l IBA in | 100      | 100      | 50            | 6          | 1           | 2             | 1.3          | 39.025 | 2.25  |
| 2 mg/l IBA in | 100      | 100      | 50            | 1          | 1           | 1.3           | 1.6          | 39.025 | 2.25  |
| 2 mg/l IBA in | 100      | 100      | 50            | 2          | 1           | 1.2           | 1.3          | 37.55  | 2.25  |
| 2 mg/l IBA in | 100      | 100      | 50            | 3          | 1           | 1.3           | 0.7          | 37.55  | 2.275 |
| 4 mg/l IBA in | 100      | 100      | 100           | 3          | 4           | 1.3           | 0.7          | 49.625 | 3.875 |

|                |     |     |     |   |   |     |     |        |       |
|----------------|-----|-----|-----|---|---|-----|-----|--------|-------|
| 4 mg/l IBA in  | 100 | 100 | 0   | 2 | 2 | 1   | 0.5 | 49.625 | 3.875 |
| 4 mg/l IBA in  | 100 | 100 | 100 | 2 | 2 | 1.8 | 0.7 | 47.325 | 3.375 |
| 4 mg/l IBA in  | 100 | 100 | 50  | 1 | 1 | 0.8 | 0.9 | 47.325 | 3.375 |
| 4 mg/l IBA in  | 100 | 100 | 50  | 5 | 1 | 1.2 | 1   | 43.25  | 3.175 |
| 4 mg/l IBA in  | 100 | 100 | 50  | 4 | 1 | 1.6 | 0.8 | 43.25  | 3.175 |
| 0 mg/l in Liqu | 100 | 100 | 0   | 0 | 0 | 0   | 0   | 0      | 0     |
| 0 mg/l in Liqu | 100 | 100 | 0   | 0 | 0 | 0   | 0   | 0      | 0     |
| 0 mg/l in Liqu | 100 | 100 | 0   | 0 | 0 | 0   | 0   | 0      | 0     |
| 0 mg/l in Liqu | 100 | 100 | 0   | 0 | 0 | 0   | 0   | 0      | 0     |
| 0 mg/l in Liqu | 100 | 100 | 0   | 0 | 0 | 0   | 0   | 0      | 0     |
| 0 mg/l in Liqu | 100 | 100 | 0   | 0 | 0 | 0   | 0   | 0      | 0     |
| 0.5 mg/l NAA   | 100 | 100 | 100 | 4 | 5 | 1.8 | 0.3 | 51.2   | 5.05  |
| 0.5 mg/l NAA   | 100 | 100 | 100 | 6 | 1 | 3.7 | 0.3 | 22.7   | 6     |
| 0.5 mg/l NAA   | 100 | 100 | 100 | 7 | 4 | 3.3 | 0.9 | 45.35  | 10.3  |
| 0.5 mg/l NAA   | 100 | 100 | 100 | 3 | 1 | 2.7 | 0.3 | 46.65  | 8.65  |
| 0.5 mg/l NAA   | 100 | 100 | 50  | 9 | 2 | 3.6 | 0.2 | 86.9   | 3.35  |
| 0.5 mg/l NAA   | 100 | 100 | 50  | 7 | 1 | 4.3 | 1.6 | 51.2   | 5.05  |
| 1 mg/l NAA in  | 100 | 100 | 100 | 8 | 1 | 3   | 0.3 | 45.35  | 8.5   |
| 1 mg/l NAA in  | 100 | 100 | 100 | 4 | 1 | 2   | 1.3 | 75.95  | 5     |
| 1 mg/l NAA in  | 100 | 100 | 100 | 7 | 2 | 3.4 | 0.2 | 66.85  | 8.55  |
| 1 mg/l NAA in  | 100 | 100 | 100 | 6 | 1 | 3.2 | 0.8 | 79.35  | 8.6   |
| 1 mg/l NAA in  | 100 | 100 | 100 | 6 | 2 | 2.5 | 0.2 | 32.05  | 4.8   |
| 1 mg/l NAA in  | 100 | 100 | 100 | 4 | 2 | 2.6 | 0.3 | 66.85  | 8.55  |
| 2 mg/l NAA in  | 100 | 100 | 50  | 5 | 0 | 1.4 | 0   | 39.25  | 4.95  |
| 2 mg/l NAA in  | 100 | 100 | 50  | 5 | 0 | 2.3 | 0   | 57.85  | 6.25  |
| 2 mg/l NAA in  | 100 | 100 | 50  | 7 | 0 | 2.5 | 0   | 36.05  | 2.15  |
| 2 mg/l NAA in  | 100 | 100 | 50  | 8 | 0 | 2.1 | 0   | 19.7   | 5     |
| 2 mg/l NAA in  | 100 | 100 | 50  | 8 | 0 | 1.6 | 0   | 15.25  | 2.25  |
| 2 mg/l NAA in  | 100 | 100 | 50  | 4 | 0 | 2   | 0   | 36.05  | 2.15  |
| 4 mg/l NAA in  | 100 | 100 | 0   | 0 | 0 | 0   | 0   | 0      | 0     |
| 4 mg/l NAA in  | 100 | 100 | 0   | 0 | 0 | 0   | 0   | 0      | 0     |
| 4 mg/l NAA in  | 100 | 100 | 0   | 0 | 0 | 0   | 0   | 0      | 0     |
| 4 mg/l NAA in  | 100 | 100 | 0   | 0 | 0 | 0   | 0   | 0      | 0     |
| 4 mg/l NAA in  | 100 | 100 | 0   | 0 | 0 | 0   | 0   | 0      | 0     |
| 4 mg/l NAA in  | 100 | 100 | 0   | 0 | 0 | 0   | 0   | 0      | 0     |
| 4 mg/l NAA in  | 100 | 100 | 0   | 0 | 0 | 0   | 0   | 0      | 0     |
| 0.5 mg/l IBA   | 100 | 100 | 0   | 0 | 0 | 0   | 0   | 0      | 0     |
| 0.5 mg/l IBA   | 100 | 100 | 0   | 0 | 0 | 0   | 0   | 0      | 0     |
| 0.5 mg/l IBA   | 100 | 100 | 0   | 0 | 0 | 0   | 0   | 0      | 0     |
| 0.5 mg/l IBA   | 100 | 100 | 0   | 0 | 0 | 0   | 0   | 0      | 0     |
| 0.5 mg/l IBA   | 100 | 100 | 0   | 0 | 0 | 0   | 0   | 0      | 0     |
| 0.5 mg/l IBA   | 100 | 100 | 0   | 0 | 0 | 0   | 0   | 0      | 0     |
| 1 mg/l IBA in  | 100 | 100 | 0   | 0 | 0 | 0   | 0   | 0      | 0     |
| 1 mg/l IBA in  | 100 | 100 | 0   | 0 | 0 | 0   | 0   | 0      | 0     |
| 1 mg/l IBA in  | 100 | 100 | 0   | 0 | 0 | 0   | 0   | 0      | 0     |
| 1 mg/l IBA in  | 100 | 100 | 0   | 0 | 0 | 0   | 0   | 0      | 0     |
| 1 mg/l IBA in  | 100 | 100 | 0   | 0 | 0 | 0   | 0   | 0      | 0     |
| 1 mg/l IBA in  | 100 | 100 | 0   | 0 | 0 | 0   | 0   | 0      | 0     |
| 1 mg/l IBA in  | 100 | 100 | 0   | 0 | 0 | 0   | 0   | 0      | 0     |
| 2 mg/l IBA in  | 100 | 100 | 0   | 0 | 0 | 0   | 0   | 0      | 0     |
| 2 mg/l IBA in  | 100 | 100 | 0   | 0 | 0 | 0   | 0   | 0      | 0     |
| 2 mg/l IBA in  | 100 | 100 | 0   | 0 | 0 | 0   | 0   | 0      | 0     |

|               |     |     |   |   |   |   |   |   |   |
|---------------|-----|-----|---|---|---|---|---|---|---|
| 2 mg/l IBA in | 100 | 100 | 0 | 0 | 0 | 0 | 0 | 0 | 0 |
| 2 mg/l IBA in | 100 | 100 | 0 | 0 | 0 | 0 | 0 | 0 | 0 |
| 2 mg/l IBA in | 100 | 100 | 0 | 0 | 0 | 0 | 0 | 0 | 0 |
| 4 mg/l IBA in | 100 | 100 | 0 | 0 | 0 | 0 | 0 | 0 | 0 |
| 4 mg/l IBA in | 100 | 100 | 0 | 0 | 0 | 0 | 0 | 0 | 0 |
| 4 mg/l IBA in | 100 | 100 | 0 | 0 | 0 | 0 | 0 | 0 | 0 |
| 4 mg/l IBA in | 100 | 100 | 0 | 0 | 0 | 0 | 0 | 0 | 0 |
| 4 mg/l IBA in | 100 | 100 | 0 | 0 | 0 | 0 | 0 | 0 | 0 |
| 4 mg/l IBA in | 100 | 100 | 0 | 0 | 0 | 0 | 0 | 0 | 0 |
| 4 mg/l IBA in | 100 | 100 | 0 | 0 | 0 | 0 | 0 | 0 | 0 |

| Treatment   | Yield  | TPC    | TFC      | TSC     | DPPH    |
|-------------|--------|--------|----------|---------|---------|
| Natural ro  | 16.161 | 1.9028 | 0.716679 | 17.9077 | 1752.71 |
| Natural ro  | 15.606 | 1.9661 | 0.759402 | 18.1335 | 1705.81 |
| Natural ro  | 15.017 | 1.9582 | 0.764742 | 17.9782 | 1766.72 |
| 0 mg/l in S | 0      | 0      | 0        | 0       | 0       |
| 0 mg/l in S | 0      | 0      | 0        | 0       | 0       |
| 0 mg/l in S | 0      | 0      | 0        | 0       | 0       |
| 0.5 mg/l N  | 12.35  | 0.8599 | 0.591478 | 14.9055 | 8759.15 |
| 0.5 mg/l N  | 11.71  | 0.8812 | 0.663434 | 14.8294 | 4510.96 |
| 0.5 mg/l N  | 11.88  | 0.8173 | 0.591478 | 14.9625 | 6287.5  |
| 1 mg/l in N | 15.95  | 1.4269 | 0.656585 | 19.1857 | 3607.57 |
| 1 mg/l in N | 15.56  | 1.4068 | 0.796572 | 19.0186 | 4602.17 |
| 1 mg/l in N | 16.61  | 1.4269 | 0.810119 | 18.4697 | 5064.56 |
| 2 mg/l NAA  | 30.47  | 3.9112 | 2.075764 | 33.3217 | 2149.17 |
| 2 mg/l NAA  | 29.91  | 3.7616 | 2.227353 | 34.2297 | 2613.84 |
| 2 mg/l NAA  | 31.62  | 3.9262 | 2.237459 | 33.9627 | 2106.3  |
| 4 mg/l NAA  | 13.82  | 1.9583 | 1.092378 | 19.25   | 2594.68 |
| 4 mg/l NAA  | 15.24  | 2.007  | 1.11588  | 19.4736 | 2920.29 |
| 4 mg/l NAA  | 15.85  | 1.9583 | 1.064175 | 19.4736 | 2737.05 |
| 0.5 mg/l IB | 30.77  | 6.3626 | 4.498389 | 18.2852 | 1580.63 |
| 0.5 mg/l IB | 39.58  | 6.3328 | 4.760158 | 18.1788 | 1570.3  |
| 0.5 mg/l IB | 37.25  | 6.2136 | 4.719885 | 17.4338 | 1352.48 |
| 1 mg/l IBA  | 28.57  | 4.9212 | 1.300642 | 18.0921 | 1764.94 |
| 1 mg/l IBA  | 32     | 4.8188 | 1.205516 | 18.0921 | 1771.95 |
| 1 mg/l IBA  | 25     | 4.8316 | 1.248755 | 18.3207 | 1685.68 |
| 2 mg/l IBA  | 29.67  | 6.3598 | 1.864567 | 18.2541 | 1208.51 |
| 2 mg/l IBA  | 34.09  | 6.4181 | 3.065608 | 19.1387 | 1213.81 |
| 2 mg/l IBA  | 28.09  | 6.1704 | 1.972858 | 19.2949 | 1204.23 |
| 4 mg/l IBA  | 30.28  | 5.8501 | 1.528883 | 20.2592 | 1297.42 |
| 4 mg/l IBA  | 28.99  | 6.0312 | 1.520725 | 21.4666 | 1302.03 |
| 4 mg/l IBA  | 27.66  | 5.7535 | 1.186231 | 20.0004 | 1299.66 |
| 0 mg/l in L | 0      | 0      | 0        | 0       | 0       |
| 0 mg/l in L | 0      | 0      | 0        | 0       | 0       |
| 0 mg/l in L | 0      | 0      | 0        | 0       | 0       |
| 0.5 mg/l N  | 43.73  | 8.8809 | 3.432313 | 35.7949 | 1016.49 |
| 0.5 mg/l N  | 46.1   | 8.7242 | 2.559018 | 37.1937 | 1014.43 |
| 0.5 mg/l N  | 45.36  | 8.6263 | 2.638409 | 36.9838 | 1010.44 |
| 1 mg/l NAA  | 43.85  | 9.8015 | 2.921799 | 39.4744 | 946.074 |
| 1 mg/l NAA  | 45.88  | 10.135 | 2.874367 | 39.4118 | 1082.91 |

|             |       |        |          |         |         |
|-------------|-------|--------|----------|---------|---------|
| 1 mg/l NAA  | 47.14 | 9.9419 | 2.732072 | 39.1611 | 1106.39 |
| 2 mg/l NAA  | 38    | 9.1931 | 2.768625 | 24.0811 | 751.465 |
| 2 mg/l NAA  | 32.93 | 9.1931 | 1.987998 | 24.3169 | 755.995 |
| 2 mg/l NAA  | 36.6  | 8.907  | 1.824438 | 24.3169 | 752.934 |
| 4 mg/l NAA  | 0     | 0      | 0        | 0       | 0       |
| 4 mg/l NAA  | 0     | 0      | 0        | 0       | 0       |
| 4 mg/l NAA  | 0     | 0      | 0        | 0       | 0       |
| 0.5 mg/l IB | 0     | 0      | 0        | 0       | 0       |
| 0.5 mg/l IB | 0     | 0      | 0        | 0       | 0       |
| 0.5 mg/l IB | 0     | 0      | 0        | 0       | 0       |
| 1 mg/l IBA  | 0     | 0      | 0        | 0       | 0       |
| 1 mg/l IBA  | 0     | 0      | 0        | 0       | 0       |
| 1 mg/l IBA  | 0     | 0      | 0        | 0       | 0       |
| 2 mg/l IBA  | 0     | 0      | 0        | 0       | 0       |
| 2 mg/l IBA  | 0     | 0      | 0        | 0       | 0       |
| 2 mg/l IBA  | 0     | 0      | 0        | 0       | 0       |
| 4 mg/l IBA  | 0     | 0      | 0        | 0       | 0       |
| 4 mg/l IBA  | 0     | 0      | 0        | 0       | 0       |
| 4 mg/l IBA  | 0     | 0      | 0        | 0       | 0       |
